# Supplementary material for: Nickel adipate coordination polymers with isomeric dipyridylamide ligands: topological disorder and divergent magnetic properties
Source: Royal Society of Chemistry journal article supplement (doi:10.1039/c6ce01368f), 2016-01-01
Supplement: c6ce01368f1.pdf [file c6ce01368f1.pdf]

## SUPPLEMENTARY INFORMATION

Nickel Adipate Coordination Polymers with Isomeric Dipyriddyamide Ligands:

Topological Disorder and Divergent Magnetic Properties

Charmaine L. White, Robert L. LaDuca<sup>†\*</sup>

<sup>†</sup>Lyman Briggs College and Department of Chemistry,

Michigan State University, East Lansing, MI 48825 USA

Fig. S1. Stacking of coordination polymer slabs in **1**.

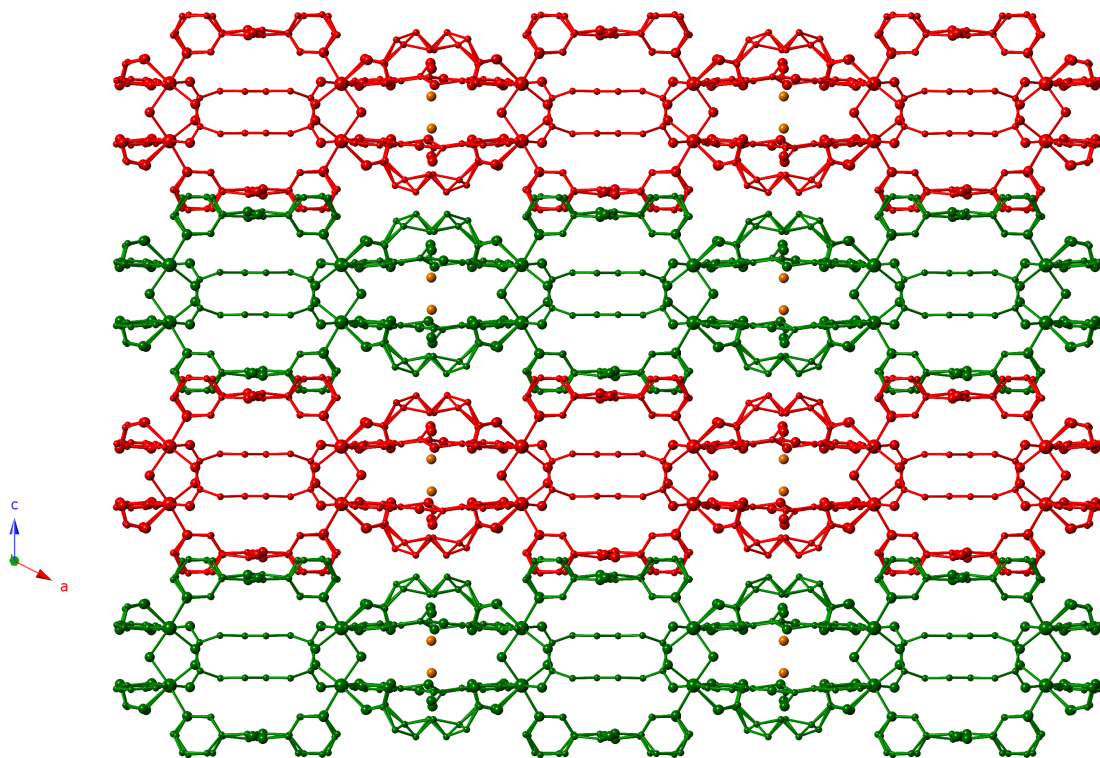

Fig. S2. Curie-Weiss plot for 1.

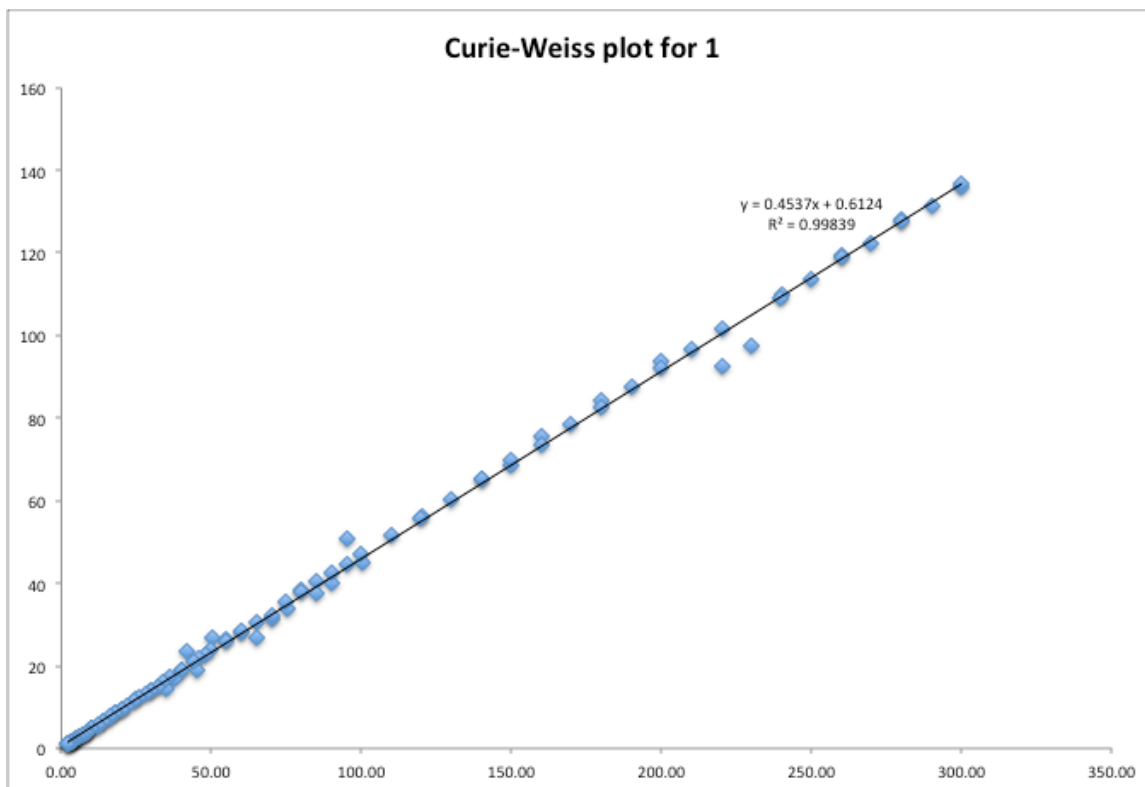

Fig. S3. Curie-Weiss plot for 2.

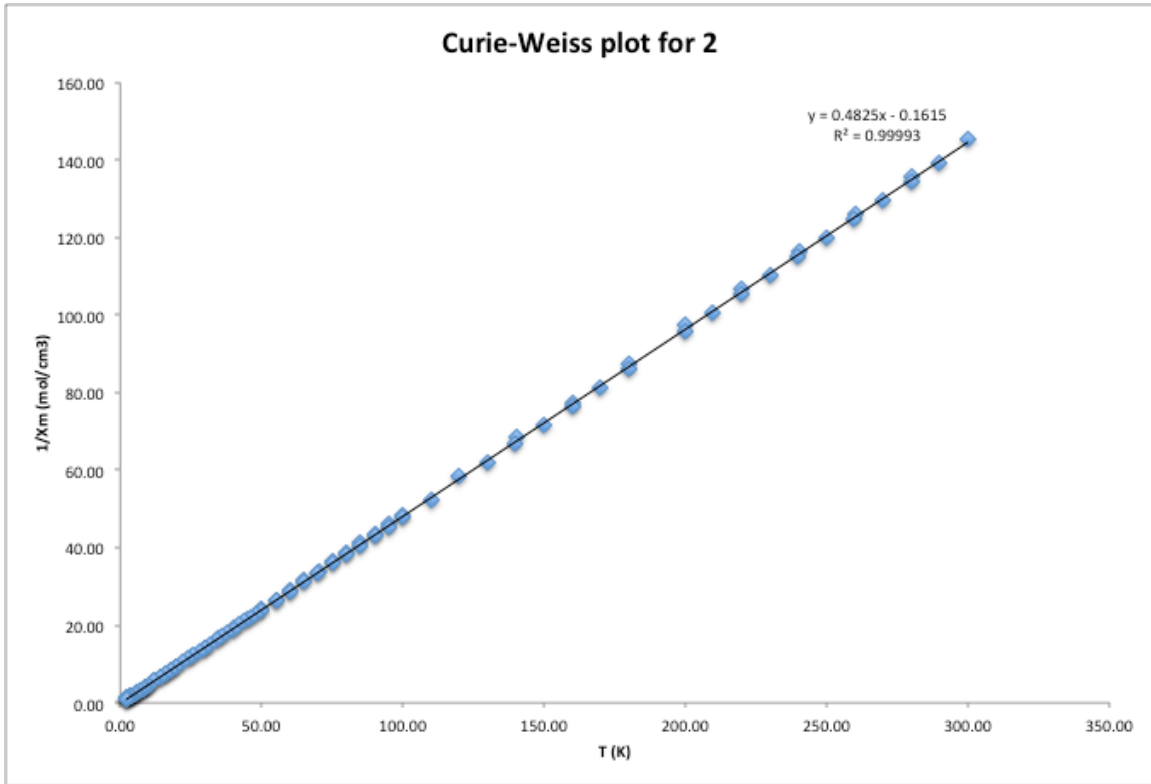

Fig. S4. TGA trace for **1**.

Sample: Ni adipia 3 pna  
Size: 7.7850 mg  
Method: LaDuca

TGA

File: C:\TA\Data\TGA\CuDPELW.011\_Ren060716114  
Operator: LaDuca  
Run Date: 07-Jun-2016 10:43  
Instrument: TGA Q50 V20.13 Build 39

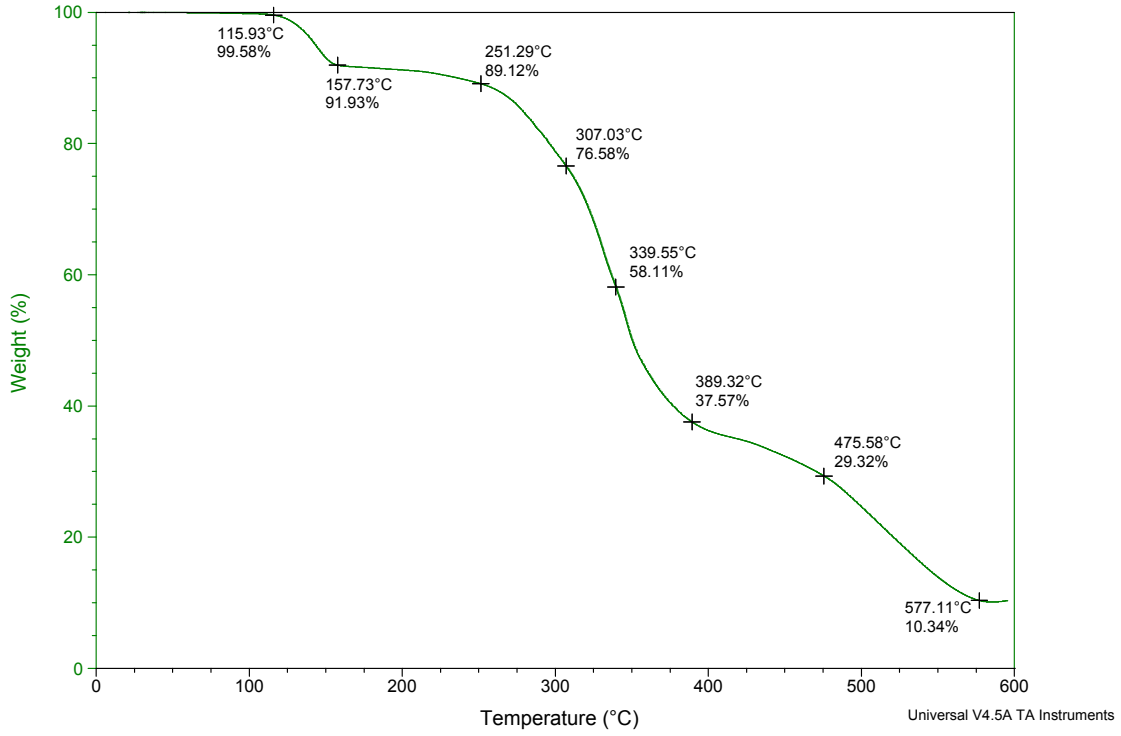

Fig. S5. TGA trace for **2**.

Sample: Ni adi 3 pina  
Size: 3.8640 mg  
Method: LaDuca

TGA

File: C:\TA\Data\TGA\CuDPELW.012\_Ren06071612!  
Operator: LaDuca  
Run Date: 07-Jun-2016 11:52  
Instrument: TGA Q50 V20.13 Build 39

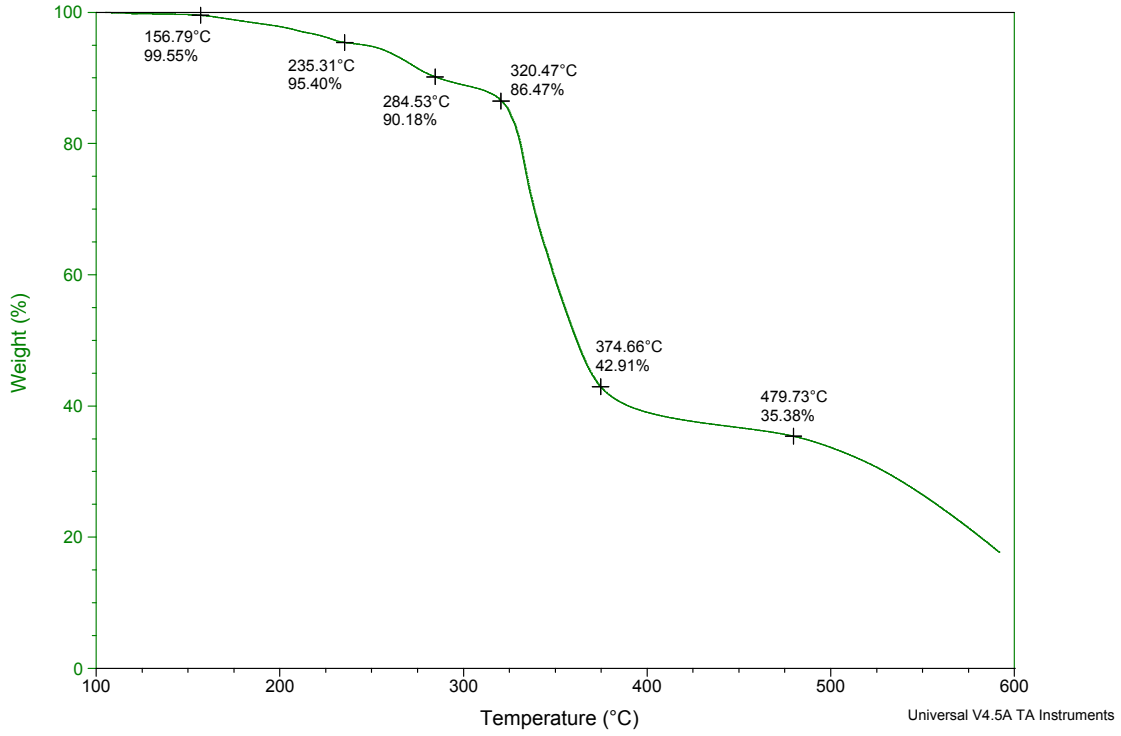

Table S1. Hydrogen bonding parameters for **1** and **2**.

| $D-H\cdots A$           | $d(H\cdots A)$ | $d(D\cdots A)$ | $\angle DHA$ | symmetry transformation for $A$ |
|-------------------------|----------------|----------------|--------------|---------------------------------|
| <b>1</b>                |                |                |              |                                 |
| N2A–H2A $\cdots$ O1WA   | 1.99           | 2.562(14)      | 121.5        |                                 |
| O1WA–H1WA $\cdots$ O10B | 1.99           | 2.78(4)        | 151.4        | $-x + 1, -y + 2, -z + 1$        |
| O1WA–H1WB $\cdots$ O2A  | 1.59           | 2.438(13)      | 165.6        | $-x + 1, -y + 1, -z + 1$        |
| O1–H1A $\cdots$ O8B     | 2.59(8)        | 2.95(4)        | 114(6)       |                                 |
| O1–H1A $\cdots$ O9B     | 1.82(7)        | 2.47(3)        | 158(7)       |                                 |
| O1–H1B $\cdots$ O10B    | 1.74(8)        | 2.65(3)        | 162(7)       | $-x + 1, -y + 2, -z + 1$        |
| <b>2</b>                |                |                |              |                                 |
| O11–H11 $\cdots$ O6     | 1.84(4)        | 2.587(4)       | 159(4)       |                                 |
| N2–H2 $\cdots$ O2W      | 1.99           | 2.816(4)       | 156.9        | $-x + 1, -y + 1, -z$            |
| N5–H5 $\cdots$ O6       | 1.95           | 2.782(4)       | 156.9        | $-x + 2, -y + 1, -z$            |
| O2W–H2WA $\cdots$ O1W   | 1.91           | 2.771(5)       | 169.8        | $x - 1, y, z - 1$               |
| O2W–H2WB $\cdots$ O4    | 1.94           | 2.801(4)       | 171.7        | $-x + 1, -y + 1, -z$            |
| O1W–H1WA $\cdots$ O7    | 2.47           | 3.007(12)      | 120.7        | $-x + 2, -y, -z + 1$            |
| O1W–H1WB $\cdots$ O1    | 1.93           | 2.796(4)       | 170.7        | $x + 1, y, z$                   |
